# Supplementary material
Source: Elsevier journal article supplement (https://www.sciencedirect.com/science/article/pii/S0211699521001995)
Supplement: mmc1 [file S0211699521001995:mmc1.docx]

**S1 File**. Search strategy according to the database.

| **PUBMED – ADVANCE SEARCH** |
| --- |
| **P**opulation: adults patients with COVID-19 (Keywords and entry terms):  (“COVID-19” OR “2019 novel coronavirus disease” OR “COVID-19 pandemic” OR “SARS-CoV-2 infection” OR “COVID-19 virus disease” OR “2019 novel coronavirus infection” OR “2019-nCoV infection” OR “coronavirus disease 2019” OR “coronavirus disease-19” OR “2019-nCoV disease” OR “COVID-19 virus infection” OR “Coronavirus Infections” OR “Coronavirus Infection” OR “Infection,  Coronavirus” OR “Infections, Coronavirus” OR “Pandemics” OR “Pandemic”) |
| **AND** |
| **Co**ndition: AKI (Keywords and entry terms):  (“Acute kidney injury” OR “Acute Kidney Injuries” OR “Kidney Injuries, Acute” OR “Kidney Injury, Acute” OR “Acute Renal Injury” OR “Acute Renal Injuries” OR “Renal Injuries, Acute” OR “Renal Injury, Acute” OR “Renal Insufficiency, Acute” OR “Acute Renal Insufficiencies” OR “Renal Insufficiencies, Acute” OR “Acute Renal Insufficiency” OR “Kidney Insufficiency, Acute” OR “Acute Kidney Insufficiencies” OR “Kidney Insufficiencies, Acute” OR “Acute Kidney Insufficiency” OR “Kidney Failure, Acute” OR “Acute Kidney Failures” OR “Kidney Failures, Acute” OR “Acute Renal Failure” OR “Acute Renal Failures” OR “Renal Failures, Acute” OR “Renal  Failure, Acute” OR “Acute Kidney Failure”) |
| **AND** |
| **O**utcomes: AKI incidence (primary) and AKI mortality (secondary) (Keywords and entry terms):  (“Incidence” OR “Incidences” OR “Incidences Studies” OR “Incidence Studies” OR “Incidence Study” OR “Studies, Incidence” OR “Study, Incidence” OR “Mortality” OR “Death Rate” OR “Death Rates” OR “Rate, Death” OR “Rates, Death” OR  “Mortality Rate” OR “Mortality Rates” OR “Rate, Mortality” OR “Rates, Mortality”) |
| **EMBASE – ADVANCE SEARCH** |
| **P**opulation: adults patients with COVID-19  (Keywords and entry terms): |

| (“COVID-19” OR “2019 novel coronavirus disease” OR “COVID-19 pandemic” OR “SARS-CoV-2 infection” OR “COVID-19 virus disease” OR “2019 novel coronavirus infection” OR “2019-nCoV infection” OR “coronavirus disease 2019” OR “coronavirus disease-19” OR “2019-nCoV disease” OR “COVID-19 virus infection” OR “Coronavirus Infections” OR “Coronavirus Infection” OR “Infection,  Coronavirus” OR “Infections, Coronavirus” OR “Pandemics” OR “Pandemic”) |
| --- |
| **AND** |
| **Co**ndition: AKI (Keywords and entry terms):  (“Acute kidney injury” OR “Acute Kidney Injuries” OR “Kidney Injuries, Acute” OR “Kidney Injury, Acute” OR “Acute Renal Injury” OR “Acute Renal Injuries” OR “Renal Injuries, Acute” OR “Renal Injury, Acute” OR “Renal Insufficiency, Acute” OR “Acute Renal Insufficiencies” OR “Renal Insufficiencies, Acute” OR “Acute Renal Insufficiency” OR “Kidney Insufficiency, Acute” OR “Acute Kidney Insufficiencies” OR “Kidney Insufficiencies, Acute” OR “Acute Kidney Insufficiency” OR “Kidney Failure, Acute” OR “Acute Kidney Failures” OR “Kidney Failures, Acute” OR “Acute Renal Failure” OR “Acute Renal Failures” OR “Renal Failures, Acute” OR “Renal  Failure, Acute” OR “Acute Kidney Failure”) |
| **AND** |
| **O**utcomes: AKI incidence (primary) and AKI mortality (secondary) (Keywords and entry terms):  (“Incidence” OR “Incidences” OR “Incidences Studies” OR “Incidence Studies” OR “Incidence Study” OR “Studies, Incidence” OR “Study, Incidence” OR “Mortality” OR “Death Rate” OR “Death Rates” OR “Rate, Death” OR “Rates, Death” OR  “Mortality Rate” OR “Mortality Rates” OR “Rate, Mortality” OR “Rates, Mortality”) |
| **LILACS – ADVANCE SEARCH** |
| **P**opulation: adults patients with COVID-19 (Keywords and entry terms):  “Coronavirus Infections” OR “Infecciones por Coronavirus” OR “Infecções por  Coronavirus” OR “COVID-19” |
| **AND** |
| **Co**ndition: AKI |

(Keywords and entry terms):

“Acute kidney injury” OR “Injuria renal aguda” OR “Lesión Renal Aguda” OR “Lesão Renal Aguda” OR “Renal Insufficiency” OR “Insuficiencia Renal” OR “Insuficiência Renal” OR “Kidney Diseases” OR “Enfermedades Renales” OR “Nefropatias” OR “Doença Renal” OR “Doenças Renais” OR “Nefropatias”

# AND

**O**utcomes: AKI incidence (primary) and AKI mortality (secondary) (Keywords and entry terms):

“Incidence” OR “Incidencia” OR “Incidência” OR “Taxa de Incidência” OR “Estudos de Incidência” OR “Mortality” OR “Mortalidad” OR “Mortalidade” OR “Morte” OR “Taxa de Mortalidade” OR “Indice de mortalidade” OR “Letalidade” OR “Sobrevida” OR “Sobrevivência”

## WEB OF SCIENCE – ADVANCE SEARCH

**P**opulation: adults patients with COVID-19 (Keywords and entry terms):

TS=(“COVID-19” OR “2019 novel coronavirus disease” OR “COVID-19 pandemic” OR “SARS-CoV-2 infection” OR “COVID-19 virus disease” OR “2019 novel coronavirus infection” OR “2019-nCoV infection” OR “coronavirus disease 2019’ OR “coronavirus disease-19” OR “2019-nCoV disease” OR ‘COVID-19 virus infection” OR “Coronavirus Infections” OR “Coronavirus Infection” OR “Infection, Coronavirus” OR “Infections, Coronavirus” OR “Pandemics” OR “Pandemic”)

# AND

**Co**ndition: AKI (Keywords and entry terms):

TS=(“Acute kidney injury” OR “Acute Kidney Injuries” OR “Kidney Injuries, Acute” OR “Kidney Injury, Acute” OR “Acute Renal Injury” OR “Acute Renal Injuries” OR “Renal Injuries, Acute” OR “Renal Injury, Acute” OR “Renal Insufficiency, Acute” OR “Acute Renal Insufficiencies” OR “Renal Insufficiencies, Acute” OR “Acute Renal Insufficiency” OR “Kidney Insufficiency, Acute” OR “Acute Kidney Insufficiencies” OR “Kidney Insufficiencies, Acute” OR “Acute Kidney Insufficiency” OR “Kidney Failure, Acute” OR “Acute Kidney Failures” OR “Kidney Failures, Acute” OR “Acute

Renal Failure” OR “Acute Renal Failures” OR “Renal Failures, Acute” OR “Renal Failure, Acute” OR “Acute Kidney Failure”)

# AND

**O**utcomes: AKI incidence (primary) and AKI mortality (secondary) (Keywords and entry terms):

TS=(“Incidence” OR “Incidences” OR “Incidences Studies” OR “Incidence Studies” OR “Incidence Study” OR “Studies, Incidence” OR “Study, Incidence” OR “Mortality” OR “Death Rate” OR “Death Rates” OR “Rate, Death” OR “Rates, Death” OR “Mortality Rate” OR “Mortality Rates” OR “Rate, Mortality” OR “Rates, Mortality”)

## SCOPUS – ADVANCE SEARCH

**P**opulation: adults patients with COVID-19 (Keywords and entry terms):

“COVID-19” OR “2019 novel coronavirus disease” OR “COVID-19 pandemic” OR “SARS-CoV-2 infection” OR “COVID-19 virus disease” OR “2019 novel coronavirus infection” OR “2019-nCoV infection” OR “coronavirus disease 2019” OR “coronavirus disease-19” OR “2019-nCoV disease” OR “COVID-19 virus infection” OR “Coronavirus Infections” OR “Coronavirus Infection” OR “Infection, Coronavirus” OR “Infections, Coronavirus” OR “Pandemics” OR “Pandemic”

# AND

**Co**ndition: AKI (Keywords and entry terms):

“Acute kidney injury” OR “Acute Kidney Injuries” OR “Kidney Injuries, Acute” OR “Kidney Injury, Acute” OR “Acute Renal Injury” OR “Acute Renal Injuries” OR “Renal Injuries, Acute” OR “Renal Injury, Acute” OR “Renal Insufficiency, Acute” OR “Acute Renal Insufficiencies” OR “Renal Insufficiencies, Acute” OR “Acute Renal Insufficiency” OR “Kidney Insufficiency, Acute” OR “Acute Kidney Insufficiencies” OR “Kidney Insufficiencies, Acute” OR “Acute Kidney Insufficiency” OR “Kidney Failure, Acute” OR “Acute Kidney Failures” OR “Kidney Failures, Acute” OR “Acute Renal Failure” OR “Acute Renal Failures” OR “Renal Failures, Acute” OR “Renal Failure, Acute” OR “Acute Kidney Failure”

# AND

**O**utcomes: AKI incidence (primary) and AKI mortality (secondary) (Keywords and entry terms):

“Incidence” OR “Incidences” OR “Incidences Studies” OR “Incidence Studies” OR “Incidence Study” OR “Studies, Incidence” OR “Study, Incidence” OR “Mortality” OR “Death Rate” OR “Death Rates” OR “Rate, Death” OR “Rates, Death” OR “Mortality Rate” OR “Mortality Rates” OR “Rate, Mortality” OR “Rates, Mortality”
