# Supplementary material
Source: Elsevier journal article supplement (https://www.sciencedirect.com/science/article/pii/S0211699521001995)
Supplement: mmc10 [file S0211699521001995:mmc10.docx]

**S10 File.** Assessment of risk of biasin the included studies.

| **Criteria** | Were the criteria for inclusion in the sample clearly defined? | Were the study subjects and the setting described in detail? | Was the exposure measured in a valid and reliable way? | Were objective, standard criteria used for measurement of the condition? | Were confounding factors identified? | Were strategies to deal with confounding factors stated? | Were the outcomes measured in a valid and reliable way? | Was appropriate statistical analysis used? | **Risk of bias** |
| --- | --- | --- | --- | --- | --- | --- | --- | --- | --- |
| **Reference** |
| Wang et al.2 | **+** | **+** | **+** | **+** | **-** | **-** | **+** | **+** | Low |
| Cheng et al.3 | **+** | **+** | **+** | **+** | **+** | **+** | **+** | **+** | Low |
| Hirsch et al.4 | **+** | **+** | **+** | **+** | **-** | **-** | **+** | **+** | Low |
| Cheng et al.5 | **+** | **+** | **+** | **+** | **-** | **-** | **+** | **+** | Low |
| Shi et al.6 | **+** | **+** | **+** | **+** | **-** | **-** | **+** | **+** | Low |
| Richardson et al.7 | **+** | **+** | **+** | **+** | **-** | **-** | **?** | **?** | Moderate |
| Guan et al.8 | **+** | **+** | **+** | **+** | **-** | **-** | **+** | **+** | Low |
| Zhang et al.9 | **+** | **+** | **+** | **+** | **-** | **-** | **+** | **+** | Low |
| Yu et al.10 | **+** | **+** | **+** | **+** | **+** | **+** | **+** | **?** | Low |
| Hong et al.16 | **+** | **-** | **+** | **+** | **-** | **-** | **+** | **+** | Moderate |
| Huang et al.17 | **+** | **-** | **+** | **+** | **-** | **-** | **-** | **+** | Moderate |
| Lei et al.18 | **+** | **+** | **+** | **+** | **-** | **-** | **+** | **+** | Low |
| Wang et al.19 | **+** | **+** | **+** | **+** | **-** | **-** | **+** | **+** | Low |
| Wang et al.20 | **+** | **+** | **+** | **+** | **+** | **+** | **+** | **+** | Low |
| Yang et al.21 | **+** | **+** | **+** | **+** | **-** | **-** | **+** | **+** | Low |
| Yang et al.22 | **+** | **+** | **+** | **+** | **+** | **+** | **+** | **+** | Low |
| Zhang et al.23 | **+** | **+** | **+** | **+** | **-** | **-** | **+** | **+** | Low |
| Zhao et al.24 | **+** | **+** | **+** | **+** | **+** | **+** | **+** | **+** | Low |
| Zheng et al.25 | **+** | **+** | **+** | **+** | **-** | **-** | **+** | **+** | Low |
| Zhou et al.26 | **+** | **+** | **+** | **+** | **+** | **+** | **+** | **+** | Low |
| Chen et al.27 | **+** | **+** | **+** | **+** | **-** | **-** | **-** | **+** | Moderate |
| Arentz et al.28 | **+** | **+** | **+** | **+** | **-** | **-** | **-** | **-** | Moderate |
| Yang et al.29 | **+** | **+** | **+** | **+** | **-** | **-** | **+** | **+** | Low |
| Wan et al.30 | **+** | **+** | **+** | **+** | **-** | **-** | **+** | **+** | Low |
| Hu et al.31 | **+** | **-** | **+** | **+** | **-** | **-** | **+** | **+** | Moderate |
| Pei et al.32 | **+** | **+** | **+** | **+** | **-** | **-** | **+** | **+** | Low |
| Aggarwal et al.33 | **+** | **-** | **+** | **+** | **-** | **-** | **+** | **+** | Moderate |
| Chen et al.34 | **+** | **+** | **+** | **+** | **-** | **-** | **+** | **+** | Low |
| Deng et al.35 | **+** | **+** | **+** | **+** | **-** | **-** | **+** | **+** | Low |
| Guo et al.36 | **+** | **+** | **+** | **+** | **-** | **-** | **+** | **+** | Low |
